# Supplementary material
Source: ML conference proceedings conference paper supplement (https://openreview.net/forum?id=etYk6TeO2q)
Supplement: supplementary_material [file attachment]

---

# Appendix for Causal Discovery from Subsampled Time Series with Proxy Variables

---

## Table of contents

|                                                                                          |          |
|------------------------------------------------------------------------------------------|----------|
| <b>A Preliminary</b>                                                                     | <b>2</b> |
| A.1 Explanation of Figure 2(c): MAG . . . . .                                            | 2        |
| A.2 Proof of Remark 2.5: Edge orientations in the MAG . . . . .                          | 2        |
| <b>B Structural identifiability</b>                                                      | <b>3</b> |
| B.1 Proof of Proposition 3.1: Identifiability of the MAG . . . . .                       | 3        |
| B.2 Proof of Proposition 3.3: MAG to summary DAG . . . . .                               | 4        |
| B.3 Proof of Theorem 3.5: Identifiability of the summary DAG . . . . .                   | 5        |
| <b>C Experiment</b>                                                                      | <b>8</b> |
| C.1 Extra results of Section 5.1: Synthetic study . . . . .                              | 8        |
| C.2 Extra results of Section 5.2: Discovering causal pathways in Alzheimer’s disease . . | 8        |

## A Preliminary

### A.1 Explanation of Figure 2(c): MAG

Table 1: Detailed explanation of edges in the MAG

| Edge in the MAG                 | Inducing path in the full time DAG                                                               |
|---------------------------------|--------------------------------------------------------------------------------------------------|
| $A(t_1) \rightarrow A(t_3)$     | $A(t_1) \rightarrow A(t_2) \rightarrow A(t_3)$                                                   |
| $A(t_1) \rightarrow M(t_3)$     | $A(t_1) \rightarrow A(t_2) \rightarrow M(t_3)$<br>$A(t_1) \rightarrow M(t_2) \rightarrow M(t_3)$ |
| $A(t_1) \rightarrow B(t_3)$     | $A(t_1) \rightarrow M(t_2) \rightarrow B(t_3)$                                                   |
| $M(t_1) \rightarrow M(t_3)$     | $M(t_1) \rightarrow M(t_2) \rightarrow M(t_3)$                                                   |
| $M(t_1) \rightarrow B(t_3)$     | $M(t_1) \rightarrow M(t_2) \rightarrow B(t_3)$<br>$M(t_1) \rightarrow B(t_2) \rightarrow B(t_3)$ |
| $B(t_1) \rightarrow B(t_3)$     | $B(t_1) \rightarrow B(t_2) \rightarrow B(t_3)$                                                   |
| $A(t_3) \leftrightarrow M(t_3)$ | $A(t_3) \leftarrow A(t_2) \rightarrow M(t_3)$                                                    |
| $M(t_3) \leftrightarrow B(t_3)$ | $M(t_3) \leftarrow M(t_2) \rightarrow B(t_3)$                                                    |

### A.2 Proof of Remark 2.5: Edge orientations in the MAG

**Remark 2.5.** *In the MAG, the directed edge  $A \rightarrow B$  means  $A$  is the ancestor of  $B$ . The bidirected edge  $A \leftrightarrow B$  means there is an unobserved confounder  $U$  between  $A$  and  $B$ .*

*Proof.* Since the meaning of the directed edge is directly induced from the definition, we focus on explaining the bidirected edge.

Specifically,  $A \leftrightarrow B$  means there is an inducing path  $p$  relative to  $\mathbf{L}$  between  $A$  and  $B$ . Since  $A \notin \mathbf{An}(B)$  and  $B \notin \mathbf{An}(A)$ , the inducing path  $p$  must contain non-mediators, *i.e.*, colliders or confounders. Suppose that there are  $r$  confounders on  $p$ , since between every two confounders there is a collider, the number of colliders on  $p$  is  $r-1$ . Denote the confounders on  $p$  as  $U_1, \dots, U_r$ , the colliders as  $C_1, \dots, C_{r-1}$ , we have  $p = A \leftarrow \dots \leftarrow U_1 \rightarrow \dots \rightarrow C_1 \leftarrow \dots \leftarrow \dots \rightarrow \dots \rightarrow C_{r-1} \leftarrow \dots \leftarrow U_r \rightarrow \dots \rightarrow B$ . According to the definition of inducing path, each collider  $C_i$  on  $p$  is the ancestor of either  $A$  or  $B$ . Based on this, the following algorithm is assured to find a latent confounder between  $A$  and  $B$ .

---

**Algorithm 1:** Find the latent confounder

---

```

1 for  $i = 1, \dots, r-1$  do
2   if  $C_i \in \mathbf{An}(B)$  then
3     return  $U_i$ ;
4   end
5 end
6 return  $U_r$ ;

```

---

/\*  $A \leftarrow \dots \leftarrow C_{i-1} \leftarrow \dots \leftarrow U_i \rightarrow \dots \rightarrow C_i \rightarrow \dots \rightarrow B$  \*/

/\*  $A \leftarrow \dots \leftarrow C_{r-1} \leftarrow \dots \leftarrow U_r \rightarrow \dots \rightarrow B$  \*/

---

□

## B Structural identifiability

### B.1 Proof of Proposition 3.1: Identifiability of the MAG

**Proposition 3.1.** *Assuming model (1) and Assumption 2.2, then the MAG over the observed variable set  $\mathbf{O}$  is identifiable, i.e., its skeleton and edge orientations can be uniquely derived from the joint distribution  $\mathbb{P}(\mathbf{O})$ .*

To prove Proposition 3.1, we first introduce the following lemma, which studies the property of the path between a vertex at  $t$  and a vertex at  $t + \tau$  ( $\tau \geq 0$ ).

**Lemma B.1.** *Suppose that there is a path between  $A(t), B(t + \tau)$  ( $\tau \geq 0$ ) denoted as  $p = A(t), V_1, \dots, V_r, B(t + \tau)$ , if  $\exists V_i$  on  $p$  such that  $\text{time}(V_i) \geq t + \tau$ , then there is a collider on  $p$  at time  $\geq t + \tau$ .*

*Proof.* We discuss two possible cases and show that  $p$  always contains a collider at time  $\geq t + \tau$ .

1.  $\forall V_i, \text{time}(V_i) \leq t + \tau$ . In this case, there is a vertex  $V_j$  on  $p$  such that  $\text{time}(V_j) = t + \tau$ . Consider its adjacent vertices  $V_{j-1}, V_{j+1}$  on the path. According to our assumption, we have  $\text{time}(V_{j-1}) = \text{time}(V_{j+1}) = t + \tau - 1$ . Hence, according to the causal precedence assumption, the edges among  $V_{j-1}, V_j, V_{j+1}$  are  $V_{j-1}(t + \tau - 1) \rightarrow V_j(t + \tau) \leftarrow V_{j+1}(t + \tau - 1)$ , which means  $V_j(t + \tau)$  is a collider on  $p$  at time  $= t + \tau$ .
2.  $\exists V_i, \text{time}(V_i) > t + \tau$ . Let  $j := \arg \max_i \text{time}(V_i)$  and  $t^* := \text{time}(V_j)$ . We have  $t^* > t + \tau$ . Consider the vertices  $V_{j-1}, V_j, V_{j+1}$ , the edges among them are  $V_{j-1}(t^* - 1) \rightarrow V_j(t^*) \leftarrow V_{j+1}(t^* - 1)$ . Hence,  $V_j(t^*)$  is a collider on  $p$  at time  $> t + \tau$ .

□

Equipped with Lemma B.1, we now introduce the proof of Proposition 3.1 below:

*Proof of Proposition 3.1.* According to [1], the skeleton of the MAG is identifiable under Assumption 2.2.

The orientation of edges in the MAG is either directed ( $\rightarrow$ ) or bi-directed ( $\leftrightarrow$ ). Since we assume that the cause must precedes the effect, instantaneous edges in the MAG must be bi-directed. In the following, we show that lagged edges in the MAG must be directed and cross  $k$  time steps, e.g.,  $A(t) \rightarrow B(t + k)$ .

Suppose that  $A(t_1)$  and  $B(t_2)$  ( $t_2 > t_1$ ) are adjacent in the MAG. We first prove that  $t_2 = t_1 + k$ . Prove by contradiction. Since  $A(t_1)$  and  $B(t_2)$  are adjacent in the MAG, there is an inducing path  $p = A(t_1), V_1, \dots, V_r, B(t_2)$  between them in the full time DAG. Suppose that  $t_2 \neq t_1 + k$ , in other words,  $t_2 \geq t_1 + 2k$ . Since the order of the SVAR process is 1, there exist  $V_i$  on  $p$  such that  $\text{time}(V_i) = t_1 + k, \text{time}(V_{i+1}) = t_1 + k + 1$ . Hence,  $V_i(t_1 + k)$  is neither latent nor a collider<sup>1</sup>. As a result, the path  $p$  is not an inducing path, which is a contradiction.

Next, we prove that the edge between  $A(t), B(t + k)$  is directed. We prove this by showing that  $A(t) \leftrightarrow B(t + k)$  can not be true. Prove by contradiction. Suppose that we have  $A(t) \leftrightarrow B(t + k)$  in the MAG, then there is an inducing path  $p = A(t), V_1, \dots, V_r, B(t + k)$  between  $A(t), B(t + k)$ , and  $A(t) \notin \mathbf{An}(B(t + k))^2$  in the full time DAG. There are three kinds of possible inducing paths:

1.  $\exists V_i$  such that  $\text{time}(V_i) \geq t + k$ ;
2.  $\forall V_i, \text{time}(V_i) < t + k$  and  $\text{time}(V_i) > t$ ;
3.  $\forall V_i, \text{time}(V_i) < t + k$  and  $\exists V_j$  such that  $\text{time}(V_j) \leq t$ .

In the following, we will show neither of these paths exist, which is a contradiction and shows that the edge between  $A(t), B(t + k)$  is directed.

<sup>1</sup>  $V_i(t_1 + k) \rightarrow V_{i+1}(t_1 + k + 1)$  means  $V_i(t_1 + k)$  can not be a collider.

<sup>2</sup>  $B(t + k)$  can not be the ancestor of  $A(t)$  according to the causal precedence assumption.

1.  $\exists V_i$  such that  $\text{time}(V_i) \geq t + k$ . In this case, according to Lemma B.1, there is a collider on  $p$  at  $\text{time} \geq t + k$ . Since the assumed causal precedence, the collider can not be the ancestor of  $A(t)$  or  $B(t + k + 1)$ . Hence, the path  $p$  is not an inducing path.
2.  $\forall V_i, \text{time}(V_i) < t + k$  and  $\text{time}(V_i) > t$ . In other words, we have  $\text{time}(V_i) = t + 1, \dots, t + k - 1$ . We show that in this case, we have  $A(t) \in \mathbf{An}(B(t + k))$  in the full time DAG, which contradicts with  $A(t) \leftrightarrow B(t + k)$  in the MAG.  
Specifically, when  $k = 2$ , the path is  $p = A(t) \rightarrow V_1(t + 1) \rightarrow B(t + 2)$ . Hence,  $A(t) \in \mathbf{An}(B(t + k))$ . When  $k \geq 3$ , consider the first  $\leftarrow$  edge along the path<sup>3</sup>, we have  $A(t) \rightarrow \dots \rightarrow V_{i-1}(t_i + 1) \leftarrow V_i(t_i)$  and  $i \geq 3$ . Therefore,  $V_{i-1}(t_i + 1)$  is the descendent of  $A(t)$  and a collider on  $p$ . According to the definition of the inducing path,  $V_{i-1}(t_i + 1)$  is the ancestor of  $B(t + k)$ , which means  $A(t) \in \mathbf{An}(B(t + k))$ .
3.  $\forall V_i, \text{time}(V_i) < t + k$  and  $\exists V_j$  such that  $\text{time}(V_j) \leq t$ . In this case, we further consider two possibilities,
  - a.  $\forall V_i, t \leq \text{time}(V_i) < t + k$ . In this case, there is a vertex  $V_j$  on  $p$  such that  $\text{time}(V_j) = t$  and we have  $V_{j-1}(t + 1) \leftarrow V_j(t) \rightarrow V_{j+1}(t + 1)$ . Therefore,  $V_j(t)$  is neither a latent variable nor a collider, which means  $p$  is not an inducing path.
  - b.  $\forall V_i, \text{time}(V_i) < t + k$  and  $\exists V_i$  such that  $\text{time}(V_i) < t$ . In this case, we have  $p = A(t), \dots, V_i(t - \tau), \dots, B(t + k)$  ( $\tau > 0$ ). As a result, there is a vertex  $V_j$  on  $p$  between  $V_i(t - \tau)$  and  $B(t + k)$  such that  $\text{time}(V_j) = t$  and  $\text{time}(V_{j+1}) = t + 1$ . Therefore,  $V_j(t)$  is neither a latent variable nor a collider, which means  $p$  is not an inducing path.

To conclude, we have shown that if there is an inducing path between  $A(t), B(t + k)$ , then  $A(t) \in \mathbf{An}(B(t + k))$ , which means all lagged edges in the MAG are directed ones.  $\square$

## B.2 Proof of Proposition 3.3: MAG to summary DAG

**Proposition 3.3.** *If there are  $A(t) \rightarrow B(t + k)$  and  $A(t + k) \leftrightarrow B(t + k)$  in the MAG, then, in the summary DAG, there is either*

1.  $A \rightarrow B$ ,
2. a directed path from  $A$  to  $B$  with length  $l \leq k - 2$ , or
3. a directed path from  $A$  to  $B$  with length  $l = k - 1$  and a confounding structure between them with lengths ( $r \leq k - 2, q \leq k - 2$ ).

*Proof.* 1. We first show that If there is  $A \rightarrow B$  in the summary DAG, then, there are  $A(t) \rightarrow B(t + k)$  and  $A(t + k) \leftrightarrow B(t + k)$  in the MAG:

Suppose that there is  $A \rightarrow B$  in the summary DAG. Then, there is a directed inducing path  $p_1 = A(t) \rightarrow A(t + 1) \rightarrow \dots \rightarrow A(t + k - 1) \rightarrow B(t + k)$  from  $A(t)$  to  $B(t + k)$  in the full time DAG. Thus, we have  $A(t) \rightarrow B(t + k)$  in the MAG.

Besides, there is an inducing path  $p_2 = A(t + k) \leftarrow A(t + k - 1) \rightarrow B(t + k)$  in the full time DAG, which means we have  $A(t + k) \leftrightarrow B(t + k)$  in the MAG.

2. We then show that if there is  $A(t) \rightarrow B(t + k)$  in the MAG, then, there is a directed path from  $A$  to  $B$  with length  $0 \leq l \leq k - 1$  (a directed path with  $l = 0$  means  $A \rightarrow B$ ) in the summary DAG:

Suppose that there is  $A(t) \rightarrow B(t + k)$  in the MAG. Then, there is a directed path  $A(t) \rightarrow V_1(t + 1) \rightarrow \dots \rightarrow V_{k-1}(t + k - 1) \rightarrow B(t + k)$  in the full time DAG. Denote the number of  $V_i$  such that  $V_i = A$  as  $r$ , then, we have  $0 \leq r \leq k - 1$ . Hence, in the summary DAG, there is a directed path from  $A$  to  $B$  with length  $l = k - r - 1$  and we have  $0 \leq l \leq k - 1$ .

3. We finally show that if there is  $A(t + k) \leftrightarrow B(t + k)$  in the MAG, then, in the summary DAG, at least one of the following structures exists:

---

<sup>3</sup>If all edges among the path are  $\rightarrow$ , then  $A(t) \in \mathbf{An}(B(t + k))$ .

- a. A directed path<sup>4</sup>  $p$  between  $A$  and  $B$  of length  $0 \leq l \leq k - 2$  (a directed path with  $l = 0$  means  $A \rightarrow B$ );
- b. A confounding structure  $c$  between  $A$  and  $B$  of length  $(r \leq k - 2, q \leq k - 2)$ .

Suppose that there is  $A(t + k) \leftrightarrow B(t + k)$  in the MAG, we will show that there is a latent confounder  $U$  between  $A(t + k)$  and  $B(t + k)$  such that  $t + 1 \leq \text{time}(U) \leq t + k - 1$ .

In this regard, if  $U = A$  or  $U = B$ , there is a directed path between  $A$  and  $B$  with length  $0 \leq l \leq k - 2$ ; Otherwise when  $U \neq A$  and  $U \neq B$ , there is a confounding structure between  $A$  and  $B$  with length  $(r \leq k - 2, q \leq k - 2)$ .

In the following, we prove that there is a latent confounder  $U$  between  $A(t + k)$  and  $B(t + k)$  such that  $t + 1 \leq \text{time}(U) \leq t + k - 1$ . Prove by contradiction. Suppose that  $\text{time}(U) \leq t$  or  $\text{time}(U) \geq t + k$ . If  $\text{time}(U) \leq t$ , then on the directed inducing path from  $U$  to  $A$ , there is a vertex at time  $t$ , which means the path can not be an inducing path. If  $\text{time}(U) \geq t + k$ , then there is a collider on the inducing path between  $U$  and  $A$  according to Lemma B.1, which means the path is not directed and  $U$  is not a latent confounder. Hence, the time of the latent confounder  $U$  is between  $t + 1$  and  $t + k - 1$ .

To conclude, combining the results in 2. and 3., we prove the proposition.  $\square$

### B.3 Proof of Theorem 3.5: Identifiability of the summary DAG

For two vertex  $A, B$ , let the vertex set  $\mathbf{M}$  contain  $A$  and any  $M_i \neq B$  such that  $A(t) \rightarrow M_i(t + k)$  in the MAG and  $M_i$  is not  $B$ 's descendant<sup>5</sup>. Let the vertex set  $\mathbf{S}$  contains any  $S_i \neq A$  such that  $S_i(t) \rightarrow B(t + k)$  or  $S_i(t) \rightarrow M_j(t + k)$  for some  $M_j \in \mathbf{M}$  in the MAG.

**Theorem 3.5.** *Assuming model (1), Assumption 2.2, and Assumptions 2.6, 2.7, 2.11, then the summary DAG is identifiable. Specifically,*

1. *There is  $A \rightarrow B$  in the summary DAG iff there are  $A(t) \rightarrow B(t + k), A(t + k) \leftrightarrow B(t + k)$  in the MAG, and the set  $\mathbf{M}(t + 1) \cup \mathbf{S}(t)$  is not sufficient to  $d$ -separate  $A(t), B(t + k)$  in the full time DAG.*
2. *The condition “the set  $\mathbf{M}(t + 1) \cup \mathbf{S}(t)$  is not sufficient to  $d$ -separate  $A(t), B(t + k)$  in the full time DAG” can be tested by the proxy variable  $\mathbf{M}(t + k)$  of the unobserved set  $\mathbf{M}(t + 1)$ .*

*Proof.* 1.  $\Rightarrow$ . Suppose that there is  $A \rightarrow B$  in the summary DAG. According to Proposition 3.3, we have  $A(t) \rightarrow B(t + k)$  and  $A(t + k) \leftrightarrow B(t + k)$  in the MAG. In addition, in the full time DAG, there is a directed path  $p = A(t) \rightarrow B(t + 1) \rightarrow \dots \rightarrow B(t + k)$  from  $A(t)$  to  $B(t + k)$ , which is not  $d$ -separated by  $\mathbf{M}(t + 1) \cup \mathbf{S}(t)$  (because  $B \notin \mathbf{M}$ ).

$\Leftarrow$ . Suppose that there are  $A(t) \rightarrow B(t + k)$  and  $A(t + k) \leftrightarrow B(t + k)$  in the MAG. According to Proposition 3.3, at least one of the following structures exists:

- a.  $A \rightarrow B$ ;
- b. A directed path  $p_{AB}$  from  $A$  to  $B$  of length  $0 < l \leq k - 2$ ;
- c. A directed path  $p_{AB}$  from  $A$  to  $B$  of length  $l = k - 1$  and a confounding structure  $c_{AB}$  between  $A$  and  $B$  of length  $(r \leq k - 2, q \leq k - 2)$ .

In the following, we show that if the set  $\mathbf{M}(t + 1) \cup \mathbf{S}(t)$  is not sufficient to  $d$ -separate  $A(t), B(t + k)$  in the full time DAG,  $A \rightarrow B$  must exist in the summary DAG. We prove this by its contrapositive statement, i.e., if  $A \rightarrow B$  does not exist, the set  $\mathbf{M}(t + 1) \cup \mathbf{S}(t)$  is sufficient to  $d$ -separate  $A(t)$  and  $B(t + k)$ .

Consider the path between  $A(t)$  and  $B(t + k)$  in the full time DAG  $p = A(t), V_1, \dots, V_l, B(t + k)$ . There are three possible cases:

- a.  $\exists V_i, \text{time}(V_i) \geq t + k$ ;
- b.  $\forall V_i, \text{time}(V_i) < t + k$  and  $\exists V_j$  such that  $\text{time}(V_j) \leq t$ ;

<sup>4</sup>The path can be from  $A$  to  $B$  or from  $B$  to  $A$ .

<sup>5</sup>This can be justified from the MAG. Specifically, if  $M_i$  is the descendant of  $B$ , then there is  $B(t) \rightarrow V_1(t + k), V_1(t) \rightarrow V_2(t + k), \dots, V_l(t) \rightarrow M_i(t + k)$  in the MAG.

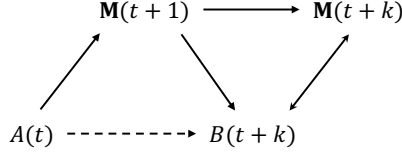

Figure 1: Causal graph over  $A(t), B(t+k), M(t+1), M(t+k)$ .

- c.  $\forall V_i, t < \text{time}(V_i) < t+k$ .

Next, we will show that if  $A \rightarrow B$  does not exist, the set  $M(t+1) \cup S(t)$  can  $d$ -separate all these three kinds of paths.

- a. For the path that  $\exists V_i, \text{time}(V_i) \geq t+k$ . According to Lemma B.1, there is a collider at  $\text{time} \geq t+k$ . Because the collider and its descendants are not in  $M(t+1) \cup S(t)$ , the path is  $d$ -separated.
  - b. For the path that  $\forall V_i, \text{time}(V_i) < t+k$  and  $\exists V_j$  such that  $\text{time}(V_j) \leq t$ . There is a vertex  $V_j$  on the path such that  $V_j(t) \rightarrow V_{j+1}(t+1) \rightarrow V_{j+2}(t+2) \rightarrow \dots$ <sup>6</sup>. If the path from  $V_j(t)$  to  $B(t+k)$  is a directed path, we have  $V_j \in S$  and the path is  $d$ -separated. Otherwise, there is a collider on the path at  $\text{time} \geq t+2$ . Neither the collider nor its descendants are in  $M(t+1) \cup S(t)$ , the path is also  $d$ -separated.
  - c. For the path that  $\forall V_i, t < \text{time}(V_i) < t+k$ . We have  $A(t) \rightarrow V_1(t+1) \rightarrow V_2(t+2) \rightarrow \dots$ . If the path from  $V_1(t+1)$  to  $B(t+k)$  is a directed one,  $V_1 \in M$ <sup>7</sup>. Otherwise, there is a collider on the path at  $\text{time} \geq t+2$ . Neither the collider nor its descendants are in  $M(t+1) \cup S(t)$ , the path is also  $d$ -separated.
2. In the following, we show that the condition “the set  $M(t+1) \cup S(t)$  is not sufficient to  $d$ -separate  $A(t), B(t+k)$  in the full time DAG” can be justified by testing  $A(t) \perp\!\!\!\perp B(t+k) | M(t+1) \cup S(t)$  with proxy variables.

- a. We first explain that  $A(t), B(t+k), M(t+1), M(t+k)$  have the causal graph shown in Fig. 1.
  - $A(t) \rightarrow M(t+1)$ . By definition,  $A$  is the ancestor of vertices in  $M$ .
  - $M(t+1) \rightarrow M(t+k)$ . By Assumption 2.10 the self causation edge always exists.
  - $M(t+1) \rightarrow B(t+k)$ . By definition,  $B$  is not the ancestor of any vertex in  $M$ .
  - $M(t+1) \leftrightarrow B(t+1)$ . According to Proposition 3.1, the instantaneous edge must be bi-directed.

Indeed, the directed edge  $M(t+1) \rightarrow B(t+k)$  and the bi-directed edge  $M(t+k) \leftrightarrow B(t+k)$  may not exist. However, according to the theory of single proxy causal discovery, as long as we have  $A(t) \perp\!\!\!\perp M(t+k) | M(t+1), S(t)$  (which will be proved in the following), we can test whether  $A(t) \rightarrow B(t+k)$  with the proxy variable  $M(t+k)$ .

- b. We next show that  $A(t) \perp\!\!\!\perp M(t+k) | M(t+1), S(t)$ , i.e.,  $M(t+k)$  can act as a legal proxy variable of  $M(t+1)$ . We prove this by showing that all path between  $A(t)$  to any  $Z_i(t+k) \in M(t+k)$  can be  $d$ -separated by  $M(t+1) \cup S(t+1)$ . Specifically, we consider two different cases:
  - When  $A \not\rightarrow B$  in the summary DAG. To prove this conclusion, again, consider three kinds of paths  $A(t), V_1, \dots, V_i, Z_i(t+k)$  between  $A(t)$  and  $Z_i(t+k)$ ,
    - i. For the path that  $\exists V_i, \text{time}(V_i) \geq t+k$ . It must contain a collider at  $\text{time} \geq t+k$ . Hence, neither the collider nor its descendant is in  $M(t+1) \cup S(t)$  and the path is  $d$ -separated.
    - ii. For the path that  $\forall V_i, \text{time}(V_i) < t+k$  and  $\exists V_j$  such that  $\text{time}(V_j) \leq t$ . Then, there is a vertex  $V_j$  on the path such that  $V_j(t) \rightarrow V_{j+1}(t+1) \rightarrow V_{j+2}(t+2) \rightarrow \dots$ . If the path between  $V_j(t)$  and  $Z_i(t+k)$  is a directed one, then we have  $V_j(t) \in S(t)$  and the path is  $d$ -separated. Otherwise, there is a collider on the path between  $V_{j+2}(t+2)$  and

<sup>6</sup>Strictly, when  $k=2$ ,  $V_{j+2}$  is  $B(t+2)$ .

<sup>7</sup> $A(t) \rightarrow V_1(t+1)$  means we have  $A(t) \rightarrow V_1(t+k)$  in the MAG.  $V_1$  is the ancestor of  $B$ , so  $V_1 \notin \text{De}(B)$ . Hence,  $V_i \in M$ .

- $Z_i(t+k)$ . Thus, neither the collider nor its descendant is in  $\mathbf{M}(t+1) \cup \mathbf{S}(t)$  and the path is also  $d$ -separated.
- iii. For the path that  $\forall V_i, t < \text{time}(V_i) < t+k$ . In this case, the path must be  $A(t) \rightarrow V_1(t+1) \rightarrow V_2(t+2) \rightarrow \dots$ . If the path between  $V_1(t+1)$  and  $Z_i(t+k)$  is a directed one, we have  $V_1(t+1) \in \mathbf{M}(t+1)$ , because of the following facts:  $V_1 \neq B$ ,  $A \rightarrow V_1$ ,  $V_1 \notin \mathbf{De}(B)$ <sup>8</sup>. As a result, the path is  $d$ -separated. Otherwise, when the path between  $V_1(t+1)$  and  $Z_i(t+k)$  is not a directed one, there is a collider on the path at  $\text{time} \geq t+2$ . Therefore, neither the collider nor its descendant is in  $\mathbf{M}(t+1) \cup \mathbf{S}(t)$  and the path is  $d$ -separated.
  - When  $A \rightarrow B$  in the summary DAG. In this case, except for the above analysis, we need to extra show that every path  $p = A(t) \rightarrow B(t+1), V_1, \dots, V_l, Z_i(t+k)$  can be  $d$ -separated by  $\mathbf{M}(t+1) \cup \mathbf{S}(t)$ . Specifically, since we define  $Z_i \notin \mathbf{De}(B)$ ,  $p$  can not be a directed path. Therefore, starting from  $B(t+1)$  along the path, at least one of the edges is  $\leftarrow$ . As a result, there is a collider on  $p$  which is either  $B(t+1)$  itself or at  $\text{time} \geq t+2$ . For both cases, neither the collider nor its descendant is in  $\mathbf{M}(t+1) \cup \mathbf{S}(t)$  and the path is  $d$ -separated.

□

---

<sup>8</sup>If  $V_1 \in \mathbf{De}(B)$ , since  $V_1$  is the ancestor of  $Z_i$ , we have  $Z_i \in \mathbf{De}(B)$ , which contradicts with the definition of the vertex set  $\mathbf{M}$ .

## C Experiment

### C.1 Extra results of Section 5.1: Synthetic study

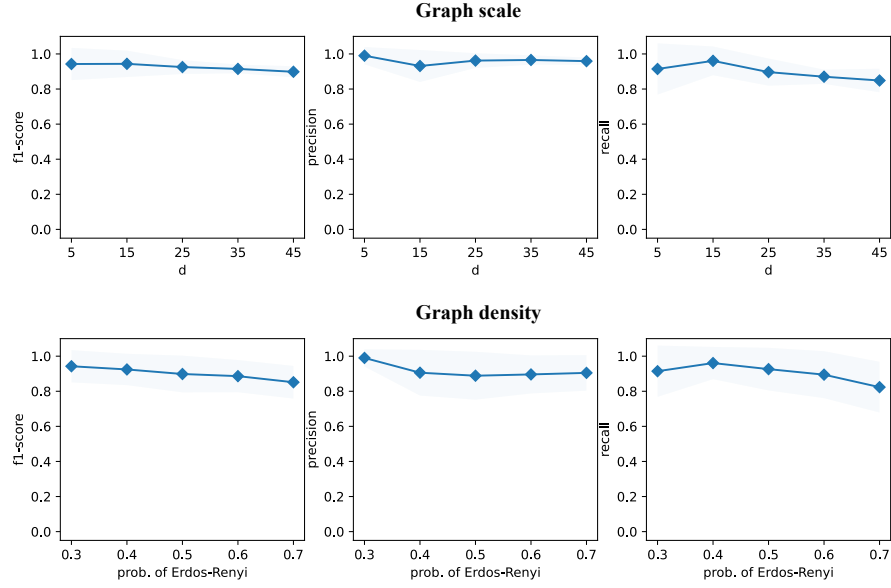

Figure 2: Performance of our method under different graph scales ( $d$  denotes the variable number) and densities (prob. denotes the edge probability in the Erdos-Renyi model).

### C.2 Extra results of Section 5.2: Discovering causal pathways in Alzheimer’s disease

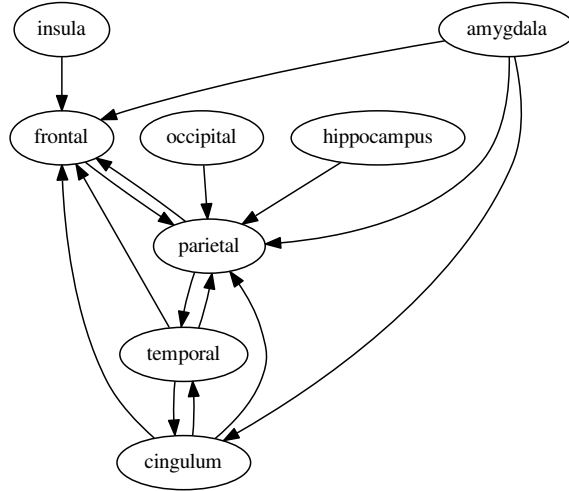

Figure 3: Summary DAG over eight meta-regions in AD recovered by the NG-EM [2] baseline.



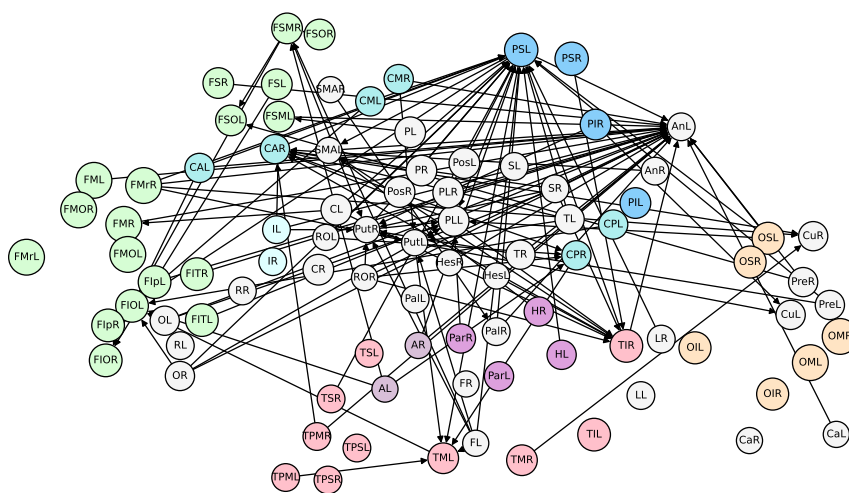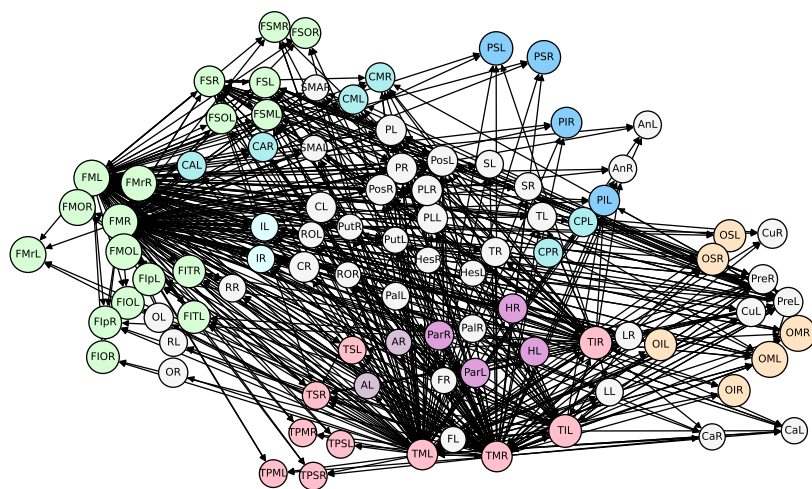

Table 2: Indices for brain regions partition in Fig. 7.

| AAL Index | Abbreviation | Full name            | AAL Index | Abbreviation | Full name            |
|-----------|--------------|----------------------|-----------|--------------|----------------------|
| 1         | PL           | Precentral L         | 2         | PR           | Precentral R         |
| 3         | FSL          | Frontal Sup L        | 4         | FSR          | Frontal Sup R        |
| 5         | FSOL         | Frontal Sup Orb L    | 6         | FSOR         | Frontal Sup Orb R    |
| 7         | FML          | Frontal Mid L        | 8         | FMR          | Frontal Mid R        |
| 9         | FMOL         | Frontal Mid Orb L1   | 10        | FMOR         | Frontal Mid Orb R1   |
| 11        | FIOL         | Frontal Inf Oper L   | 12        | FIOR         | Frontal Inf Oper R   |
| 13        | FITL         | Frontal Inf Tri L    | 14        | FITR         | Frontal Inf Tri R    |
| 15        | FIP L        | Frontal Inf Orb L    | 16        | FIP R        | Frontal Inf Orb R    |
| 17        | ROL          | Rolandic Oper L      | 18        | ROR          | Rolandic Oper R      |
| 19        | SMAL         | Supp Motor Area L    | 20        | SMAR         | Supp Motor Area R    |
| 21        | OL           | Olfactory L          | 22        | OR           | Olfactory R          |
| 23        | FSML         | Frontal Sup Medial L | 24        | FSMR         | Frontal Sup Medial R |
| 25        | FMrL         | Frontal Mid Orb L2   | 26        | FMrR         | Frontal Mid Orb R2   |
| 27        | RL           | Rectus L             | 28        | RR           | Rectus R             |
| 29        | IL           | Insula L             | 30        | IR           | Insula R             |
| 31        | CAL          | Cingulum Ant L       | 32        | CAR          | Cingulum Ant R       |
| 33        | CML          | Cingulum Mid L       | 34        | CMR          | Cingulum Mid R       |
| 35        | CPL          | Cingulum Post L      | 36        | CPR          | Cingulum Post R      |
| 37        | HL           | Hippocampus L        | 38        | HR           | Hippocampus R        |
| 39        | ParL         | ParaHippocampal L    | 40        | ParR         | ParaHippocampal R    |
| 41        | AL           | Amygdala L           | 42        | AR           | Amygdala R           |
| 43        | CaL          | Calcarine L          | 44        | CaR          | Calcarine R          |
| 45        | CuL          | Cuneus L             | 46        | CuR          | Cuneus R             |
| 47        | LL           | Lingual L            | 48        | LR           | Lingual R            |
| 49        | OSL          | Occipital Sup L      | 50        | OSR          | Occipital Sup R      |
| 51        | OML          | Occipital Mid L      | 52        | OMR          | Occipital Mid R      |
| 53        | OIL          | Occipital Inf L      | 54        | OIR          | Occipital Inf R      |
| 55        | FL           | Fusiform L           | 56        | FR           | Fusiform R           |
| 57        | PosL         | Postcentral L        | 58        | PosR         | Postcentral R        |
| 59        | PSL          | Parietal Sup L       | 60        | PSR          | Parietal Sup R       |
| 61        | PIL          | Parietal Inf L       | 62        | PIR          | Parietal Inf R       |
| 63        | SL           | SupraMarginal L      | 64        | SR           | SupraMarginal R      |
| 65        | AnL          | Angular L            | 66        | AnR          | Angular R            |
| 67        | PreL         | Precuneus L          | 68        | PreR         | Precuneus R          |
| 69        | PLL          | Paracentral Lobule L | 70        | PLR          | Paracentral Lobule R |
| 71        | CL           | Caudate L            | 72        | CR           | Caudate R            |
| 73        | PutL         | Putamen L            | 74        | PutR         | Putamen R            |
| 75        | PalL         | Pallidum L           | 76        | PalR         | Pallidum R           |
| 77        | TL           | Thalamus L           | 78        | TR           | Thalamus R           |
| 79        | HesL         | Heschl L             | 80        | HesR         | Heschl R             |
| 81        | TSL          | Temporal Sup L       | 82        | TSR          | Temporal Sup R       |
| 83        | TPSL         | Temporal Pole Sup L  | 84        | TPSR         | Temporal Pole Sup R  |
| 85        | TML          | Temporal Mid L       | 86        | TMR          | Temporal Mid R       |
| 87        | TPML         | Temporal Pole Mid L  | 88        | TPMR         | Temporal Pole Mid R  |
| 89        | TIL          | Temporal Inf L       | 90        | TIR          | Temporal Inf R       |

## References

- [1] Jiji Zhang. On the completeness of orientation rules for causal discovery in the presence of latent confounders and selection bias. *Artificial Intelligence*, 172(16-17):1873–1896, 2008.
- [2] Mingming Gong, Kun Zhang, Bernhard Schölkopf, Dacheng Tao, and Philipp Geiger. Discovering temporal causal relations from subsampled data. In *International Conference on Machine Learning*, pages 1898–1906. PMLR, 2015.
- [3] Roxana Pamfil, Nisara Sriwattanaworachai, Shaan Desai, Philip Pilgerstorfer, Konstantinos Georgatzis, Paul Beaumont, and Bryon Aragam. Dynotears: Structure learning from time-series data. In *International Conference on Artificial Intelligence and Statistics*, pages 1595–1605. PMLR, 2020.
